# Supplementary material
Source: Springer Nature journal article supplement (https://www.springermedizin.de/resource/supplementary/12990_2010_301_MOESM3_ESM.pdf/9612984)

**a****MT lesion sites**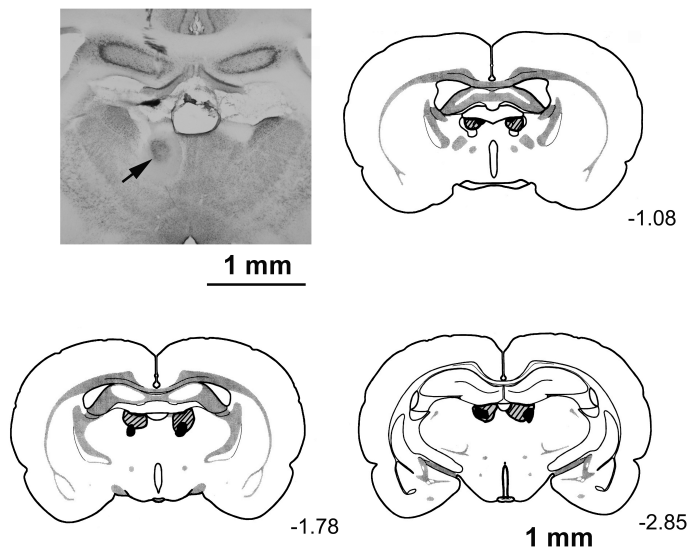**b****Short and long retention tests**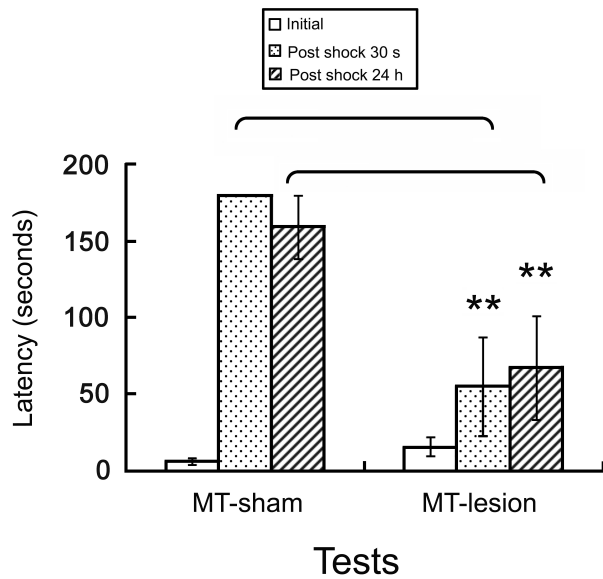

Supplement: MOESM3 [file 9612984]
